# Supplementary material
Source: publisher figshare collection journal article supplement (https://gsajournals.figshare.com/ndownloader/files/28151868)
Supplement: Supplementary file 1 [file 28151868]

 9 1104
LS070_Carollia_perspicillata_mybaits_NODE_1_length_1624_cov_66.327085|OR14 ------CTGGTGACGGAATTCTCGTTTGTGAGATGGACTGAGAGTCGGGCGCTGTCGAGGCTTCACGCTGCCTTCTTCTCGCTGCTCTACCTTGTGGCCATGTGGGAGAATGCCATCATCATTTTCCTCarollia_castaneaGTTCTTGACCGTCACCTCCarollia_castaneaCCCCGATGTACTTCTTCCTCAGGCATTTGTCCTTCTTAGACCTCTGTCTCATTTCTGCCarollia_castaneaGTCCCCAAGTCCATCCTCGACTCGGTCACCTTC---ACTGACTCCATCTCTTTCCTGGGGTGTGCGGTACAACTCTTCCTGGTGGTGCTCATGGCCGGGTCAGAGATCGGCATCCTCACGGCGATGTCCTATGACCGCTATGTCGCCATCTGCCGCCCTCTGCATTACGAAGCTGTCATGAGCAAAGGGACCTCTGTCCTTTTGACGGCTGTGTCCTGGCTCAATGGAGGGGCCTTGGGCATCTTGTACTCAACTGGGACATTCTCTCTGAAATTCTGTGGGTCCAATCAGATACACCAGTTCTTCTGTGATGTCCCT------GCCCTACTGAAGCTCACGTGTTCAGAACAGCACGTGACTATTCACGTCGGCGTGGCCATTGGTGTCTGTTATGCATTTCCATGTTTAGCTTGCATC---------------------GTGGTCTCCTATATGCGTATTTTCTCCACCGTGCTGAAGATCCCAACCAGGCAGAAGCAGTCCAAAGCCTTTTCCACCTGCCTGCCTCACCTCATC------------------------GTCGTGAGCATGTTCCTTCTG---------------------ACAGGCGCTGTTGCTTACTTAAAACCAGCATCTGACCAGCCC---------------------------TCCCTTCCAGACTTGCTGGTGTCTGCC---------------TTCTATTCTGTGGCACCCCCAACCTTGAACCCTGTGATCTACTGTCTGAGAAACAAGGACATGAAAGCAGCACTAGGAAAAGTCCTGTGGATTGATAGGAATAGGAGA---AAAGTGGTAGGTAGAAAG---------------------------------------------
LS070_Carollia_perspicillata_mybaits_NODE_1_length_1701_cov_65.254926|OR14 ------CTGGTGACGGAATTCTCGTTTGTGAGATGGACTGAGAGTCGGGCGCTGTCGAGGCTTCACGCTGCCTTCTTCTCGCTGCTCTACCTTGTGGCCATGTGGGAGAATGCCATCATCATTTTCCTCarollia_castaneaGTTCTTGACCGTCACCTCCarollia_castaneaCCCCGATGTACTTCTTCCTCAGGCATTTGTCCTTCTTAGACCTCTGTCTCATTTCTGCCarollia_castaneaGTCCCCAAGTCCATCCTCGACTCGGTCACCTTC---ACTGACTCCATCTCTTTCCTGGGGTGTGCGGTACAACTCTTCCTGGTGGTGCTCATGGCCGGGTCAGAGATCGGCATCCTCACGGCGATGTCCTATGACCGCTATGTCGCCATCTGCCGCCCTTTGCATTACGAAGCTGTCATGAGCAAAGGGACCTCTGTCCTTTTGACGGCTGTGTCCTGGCTCAATGGAGGGGCCTTGGGCATCTTGTACTCAACTGGGACATTCTCTCTGAAATTCTGTGGGTCCAATCAGATACACCAGTTCTTCTGTGATGTCCCT------GCCCTACTGAAGCTCACGTGTTCAGAACAGCACGTGACTATTCACGTCGGCGTGGCCATTGGTGTCTGTTATGCATTTCCATGTTTAGCTTGCATC---------------------GTGGTCTCCTATATGCGTATTTTCTCCACCGTGCTGAAGATCCCAACCAGGCAGAAGCAGTCCAAAGCCTTTTCCACCTGCCTGCCTCACCTCATC------------------------GTCGTGAGCATGTTCCTTCTG---------------------ACAGGCGCTGTTGCTTACTTAAAACCAGCATCCGACCAGCCC---------------------------TCCCTTCCAGACTTGCTGGTGTCTGCC---------------TTCTATTCTGTGGCACCCCCAACCTTGAACCCTGTGATCTACTGTCTGAGAAACAAGGACATGAAAGCAGCGCTAGGAAAAGTCCTGTGGATTGATAGGAATAGGAGA---AAAGTTGTAGGTAGAAAG---------------------------------------------
LS070_Carollia_perspicillata_mybaits_NODE_1_length_1644_cov_57.294831|OR14 ------CTGGTGACGGAATTCTCGTTTGTGAGATGGACTGAGAGTCGGGCGCTGTCGAGGCTTCACGCTGCCTTCTTCTCGCTGCTCTACCTTGTGGCCATGTGGGAGAATGCCATCATCATTTTCCTCarollia_castaneaGTTCTTGACCGTCACCTCCarollia_castaneaCCCCGATGTACTTCTTCCTCAGGCATTTGTCCTTCTTAGACCTCTGTCTCATTTCTGCCarollia_castaneaGTCCCCAAGTCCATCCTCGACTCGGTCACCTTC---ACTGACTCCATCTCTTTCCTGGGGTGTGCGGTACAACTCTTCCTGGTGGTGCTCATGGCCGGGTCAGAGATCGGCATCCTCACGGCGATGTCCTATGACCGCTATGTCGCCATCTGCCGCCCTTTGCATTACGAAGCTGTCATGAGCAAAGGGACCTCTGTCCTTTTGACGGCTGTGTCCTGGCTCAATGGAGGGGCCTTGGGCATCTTGTACTCAACTGGGACATTCTCTCTGAAATTCTGTGGGTCCAATCAGATACACCAGTTCTTCTGTGATGTCCCT------GCCCTACTGAAGCTCACGTGTTCAGAACAGCACGTGACTATTCACGTCGGTGTGGCCATCGGTGTCTGTTATGCATTTTCATGTTTAGCTTGCATC---------------------GTGGTCTCCTATATGCGTATTTTCTCCACCGTGCTGAAGATCCCAACCAGGCAGAAGCAGTCCAAAGCCTTTTCCACCTGCCTGCCTCACCTCATC------------------------GTCGTGAGCATGTTCCTTCTG---------------------ACAGGCGCTGTTGCTTACTTAAAACCAGCATCTGACCAGCCC---------------------------TCCCTTCCAGACTTGCTGGTGTCTGCC---------------TTCTATTCTGTGGCACCCCCAACCTTGAACCCTGTGATCTACTGTCTGAGAAACAAGGACATGAAAGCAGCGCTAGGAAAAGTCCTGTGGATTGATAGGAATAGGAGA---AAAGTTGTAGGTAGAAAG---------------------------------------------
LS070_Carollia_perspicillata_mybaits_NODE_1_length_1764_cov_59.029638|OR14 ------CTGGTGACGGAATTCTCGTTTGTGAGATGGACTGAGAGTCGGGCGCTGTCGAGGCTTCACGCTGCCTTCTTCTCGCTGCTCTACCTTGTGGCCATGTGGGAGAATGCCATCATCATTTTCCTCarollia_castaneaGTTCTTGACCGTCACCTCCarollia_castaneaCCCCGATGTACTTCTTCCTCAGGCATTTGTCCTTCTTAGACCTCTGTCTCATTTCTGCCarollia_castaneaGTCCCCAAGTCCATCCTCGACTCGGTCACCTTC---ACTGACTCCATCTCTTTCCTGGGGTGTGCGGTACAACTCTTCCTGGTGGTGCTCATGGCCGGGTCAGAGATCGGCATCCTCACGGCGATGTCCTATGACCGCTATGTCGCCATCTGCCGCCCTCTGCATTACGAAGCTGTCATGAGCAAAGGGACCTCTGTCCTTTTGACGGCTGTGTCCTGGCTCAATGGAGGGGCCTTGGGCATCTTGTACTCAACTGGGACATTCTCTCTGAAATTCTGTGGGTCCAATCAGATACACCAGTTCTTCTGTGATGTCCCT------GCCCTACTGAAGCTCACGTGTTCAGAACAGCACGTGACTATTCACGTCGGTGTGGCCATCGGTGTCTGTTATGCATTTTCATGTTTAGCTTGCATC---------------------GTGGTCTCCTATATGCGTATTTTCTCCACCGTGCTGAAGATCCCAACCAGGCAGAAGCAGTCCAAAGCCTTTTCCACCTGCCTGCCTCACCTCATC------------------------GTCGTGAGCATGTTCCTTCTG---------------------ACAGGCGCTGTTGCTTACTTAAAACCAGCATCTGACCAGCCC---------------------------TCCCTTCCAGACTTGCTGGTGTCTGCC---------------TTCTATTCTGTGGCACCCCCAACCTTGAACCCTGTGATCTACTGTCTGAGAAACAAGGACATGAAAGCAGCGCTAGGAAAAGTCCTGTGGATTGATAGGAATAGGAGA---AAAGTTGTAGGTAGAAAG---------------------------------------------
LS073_Carollia_sowelli_mybaits_NODE_1_length_1652_cov_74.149841|OR14 ------CTGGTGACGGAATTCTCGTTTGTGAGATGGACTGAGAGTCGGGCGCTGTTGAGGCTTCACGCCGCCTTCTTCTCGCTGCTCTACCTTGTGGCCATGTGGGAGAATGTCATCATCATTTTCCTCarollia_castaneaGTTCTTGACCGTCACCTCCarollia_castaneaCCCCGATGTACTTCTTCCTCAGGCATTTGTCCTTCTTAGACCTTTGTCTCATTTCTGCCarollia_castaneaGTCCCCAAGTCCATCCTCGACTCGGTCACCTTC---ACTGACTCCATCTCTTTCCTGGGGTGTGCGGTACAACTCTTCCTGGTGGTGCTCATGGCCGGGTCAGAGATTGGCATCCTCACGGCGATGTCCTATGACCGCTATGTCGCCATCTGCCGCCCTCTGCATTACGAAGCTGTCATGAGCAAAGGGACCTCTGTCCTTTTGACGGCTGTGTCCTGGCTCAATGGAGGGGCCTTGGGCATCTTGTACTCAACTGGGACATTCTCTCTGAAATTCTGTGGGTCCAATCAGATACACCAGTTCTTCTGTGATGTCCCT------GCCCTACTGAAGCTCACGTGTTCAGAACAGCACGTGACTATTCACGTCGGCGTGGCCATTGGTGTCTGTTATGCATTTTCATGTTTAGCTTGCATC---------------------GTGGTCTCCTATATGCGTATTTTCTCCACCGTGCTGAAGATCCCAACCAGGCAGAAGCAGCCCAAAGCCTTTTCCACCTGCCTGCCTCACCTCATC------------------------GTCGTGAGCATGTTCCTTCTG---------------------ACAGGCGCTGTTGCTTACTTAAAACCAGCATCCGACAAGCCC---------------------------TCCCTTCCAGACTTGCTGGTGTCTGCC---------------TTCTATTCTGTGGCACCCCCAACCTTGAACCCTGTGATCTACTGTCTGAGAAACAAGGACATGAAAGCAGCGCTAGGAAAAGTCCTGTGGATTGATAGGAATAGGAGA---AAAGTTGTAGGTAGAAAG---------------------------------------------
LS073_Carollia_sowelli_mybaits_NODE_1_length_1838_cov_68.791596|OR14 ------CTGGTGACGGAATTCTCGTTTGTGAGATGGACTGAGAGTCGGGCGCTGTTGAGGCTTCACGCCGCCTTCTTCTCGCTGCTCTACCTTGTGGCCATGTGGGAGAATGTCATCATCATTTTCCTCarollia_castaneaGTTCTTGACCGTCACCTCCarollia_castaneaCCCCGATGTACTTCTTCCTCAGGCATTTGTCCTTCTTAGACCTTTGTCTCATTTCTGCCarollia_castaneaGTCCCCAAGTCCATCCTCGACTCGGTCACCTTC---ACTGACTCCATCTCTTTCCTGGGGTGTGCGGTACAACTCTTCCTGGTGGTGCTCATGGCCGGGTCAGAGATCGGCATCCTCACGGCGATGTCCTATGACCGCTATGTCGCCATCTGCCGCCCTCTGCATTATGAAGCTGTCATGAGCAAAGGGACCTCTGTCCTTTTGACGGCTGTGTCCTGGCTCAATGGAGGGGCCTTGGGCATCTTGTACTCAACTGGGACATTCTCTCTGAAATTCTGTGGGTCCAATCAGATACACCAGTTCTTCTGTGATGTCCCT------GCCCTACTGAAGCTCACGTGTTCAGAACAGCACGTGACTATTCACGTCGGCGTGGCCATTGGTGTCTGTTATGCATTTTCATGTTTAGCTTGCATC---------------------GTGGTCTCCTATATGCGTATTTTCTCCACCGTGCTGAAGATCCCAACCAGGCAGAAGCAGCCCAAAGCCTTTTCCACCTGCCTGCCTCACCTCATC------------------------GTCGTGAGCATGTTCCTTCTG---------------------ACAGGCGCTGTTGCTTACTTAAAACCAGCATCCGACAAGCCC---------------------------TCCCTTCCAGACTTGCTGGTGTCTGCC---------------TTCTATTCTGTGGCACCCCCAACCTTGAACCCTGTGATCTACTGTCTGAGAAACAAGGACATGAAAGCAGCGCTAGGAAAAGTCCTGTGGATTGATAGGAATAGGAGA---AAAGTTGTAGGTAGAAAG---------------------------------------------
LS084_Carollia_castanea_mybaits_NODE_1_length_1990_cov_23.496079|OR14 ---------------------TTGTTTGTGAGATGGACTGAGAGTTGGGTGCTGTCGAGGCTTCACGCCGCCTTCTTCTCGCTGCTCTACCTTGTGGCCATGTGGGAGAATGTCATCATCATTTTCCTCarollia_castaneaGTTCTTGACCGTCACCTCCarollia_castaneaCCCCGATGTACTTCTTCCTCAGGCATTTGTCCTTCTTAGACCTTTGTCTCATTTCTGCCarollia_castaneaGTCCCCAAGTCCATCCTCAACTCGGTCACCTTC---ACTGACTCCATCTCTTTCCTGGGGTGTGCGGTACAACTCTTCCTGGTGGTGCTCATGGCCGGGTCAGAGATCGGCATCCTCACGGCGATGTCCTATGACCACTATGTCGCCATCTGCCGCCCTCTGCATTACGAAGCTGTCATGAGCAAAGGGACCTCTGTCCTTTTGACGGCTGTGTCCTGGCTCAATGGAGGGGCCTTGGGCATCTTGTACTCAACTGGGACATTCTCTCTGAAATTCTGTGGGTCCAATCAGATTCACCAGTTCTTCTGTGATGTCCCT------GCCCTACTGAAGCTCACGTGTTCAGAACAGTACGTGACTATTCACGTCGGTGTGGCCATCGGTGTCTGTTACGCATTTTCATGTTTAGTTTGCATC---------------------ATGGTCTCCTATATGTGTATTTTCTCCACCGTGCTGAAGATCCCAACCAGGCAGAAGCAGTCCAAAGCCTTTTCCACCTGCCTGCCTCACCTCATC------------------------GTCCTGTGCATGTTCCTTCTG---------------------ACAGGTGCTGTTGCTTACTTAAAACCAGCATCCGGAACTTCCGGCCAAGATGGAGGCATAGGTGGAAACACTGTACCTCCTCTCarollia_castaneaACCAAGATTAAGGACAACAAATATTTAAAAACAATAACarollia_castaneaACCAGAACarollia_castaneaGAAAATTGAAATAC------GGAAGTCGACAACTATTCAACCAGACCGGTAAGAGGGGCGGAGTCGGCAGGCGGCGGAGAGGGAAAGCGGCAGGAAAACGTGGTGGCTGCCAGGCTCGGGAGCGCCGGGCGGCG------------
LS084_Carollia_castanea_mybaits_NODE_1_length_2070_cov_24.102860|OR14 ---------------------TTGTTTGTGAGATGGACTGAGAGTTGGGTGCTGTCGAGGCTTCACGCCGCCTTCTTCTCGCTGCTCTACCTTGTGGCCATGTGGGAGAATGTCATCATCATTTTCCTCarollia_castaneaGTTCTTGACCGTCACCTCCarollia_castaneaCCCCGATGTACTTCTTCCTCAGGCATTTGTCCTTCTTAGACCTTTGTCTCATTTCTGCCarollia_castaneaGTCCCCAAGTCCATCCTCAACTCGGTCACCTTC---ACTGACTCCATCTCTTTCCTGGGGTGTGCGGTACAACTCTTCCTGGTGGTGCTCATGGCCGGGTCAGAGATCGGCATCCTCACGGCGATGTCCTATGACCGCTATGTCGCCATCTGCCGCCCTCTGCATTACGAAGCTGTCATGAGCAAAGGGACCTCTGTCCTTTTGACGGCTGTGTCCTGGCTCAATGGAGGGGCCTTGGGCATCTTGTACTCAACTGGGACATTCTCTCTGAAATTCTGTGGGTCCAATCAGATTCACCAGTTCTTCTGTGATGTCCCT------GCCCTACTGAAGCTCACGTGTTCAGAACAGTACGTGACTATTCACGTCGGTGTGGCCATCGGTGTCTGTTACGCATTTTCATGTTTAGTTTGCATC---------------------ATGGTCTCCTATATGTGTATTTTCTCCACCGTGCTGAAGATCCCAACCAGGCAGAAGCAGTCCAAAGCCTTTTCCACCTGCCTGCCTCACCTCATC------------------------GTCCTGTGCATGTTCCTTCTG---------------------ACAGGTGCTGTTGCTTACTTAAAACCAGCATCCGGAACTTCCGGCCAAGATGGAGGCATAGGTGGAAACACTGTACCTCCTCTCarollia_castaneaACCAAGATTAAGGACAACAAATATTTAAAAACAATAACarollia_castaneaACCAGAACarollia_castaneaGAAAATTGAAATAC------GGAAGTCGACAACTATTCAACCAGACCGGTAAGAGGGGCGGAGTCGGCAGGCGGCGGAGAGGGAAAGCGGCAGGAAAACGTGGTGGCTGCCAGGCTCGGGAGCGCCGGGCGGCG------------
ROOT_NM_000676.2_root_extraction ATGCTGCTGGAGACarollia_castaneaG------------------------------------GACGCGCTGTACGTGGCGCTGGAGCTGGTCATCGCCGCGCTTTCGGTGGCGGGCAACGTGCTGGTGTGCGCCGCGGTGGGCACGGCGAACACTCTGCAGACGCCCACCAACTACTTCCTGGTGTCCCTGGCTGCGGCCGACGTGGCCGTGGGGCTCTTCGCCATCCCCTTTGCCATCACCATCAGCCTGGGCTTCTGCACTGAC---------TTCTACGGCTGCCTCTTCCTCGCCTGCTTCGTGCTGGTGCTCACGCAGAGCTCCATCTTCAGCCTTCTGGCCGTGGCAGTCGACAGATACCTGGCCATCTGTGTCCCGCTCAGGTATAAAAGTTTGGTCACGGGGACCCGAGCAAGAGGGGTCATTGCTGTCCTCTGGGTCCTTGCCTTTGGCATCGGATTGACTCCATTCCTGGGGTGGAACAGT---AAAGACAGTGCCACCAACAAC---------------TGCarollia_castaneaGAACCCTGGGATGGAACCACGAATGAAAGCTGCTGCCTTGTGAAGTGTCTCTTTGAGAATGTGGTCCCCATGAGCTACATGGTATATTTCAATTTCTTTGGGTGTGTTCTGCCCCCACTGCTTATAATGCTGGTGATCTACATTAAGATCTTCCTGGTGGCCTGCAGGCAGCTTCAGCGCACTGAGCTGATGGACCACTCGAGGACCACCCTCCAGCGGGAGATCCATGCAGCCAAGTCACTGGCCATGATTGTGGGGATTTTTGCCCTGTGCTGGTTACCTGTGCATGCTGTTAACTGTGTCACTCTTTTCCAGCCAGCTCAG------------------------------GGTAAAAATAAGCCCAAGTGG---------GCAATGAATATGGCCATTCTTCTGTCarollia_castaneaTGCCAATTCAGTTGTCAATCCCATTGTCTATGCTTACCGGAACCGAGACTTCCGCTACACTTTTCarollia_castaneaAAATT------ATCTCCAGGTATCTTCTCTGCCAAGCAGATGTCAAGAGTGGGAATGGTCAGGCTGGGGTACAGCCTGCTCTCGGTGTGGGCCTA
